# Supplementary material for: Loss to Follow-Up from HIV Screening to ART Initiation in Rural China
Source: PLoS One. 2016 Oct 21;11(10):e0164346. doi: 10.1371/journal.pone.0164346 (PMC5074455; doi:10.1371/journal.pone.0164346)
Supplement: S1 Dataset — (XLSX) [file pone.0164346.s001.xlsx]

## Sheet: Testing and Treatment Completio
Testing and Treatment Completeness Rates from Jan-Jun 2013
N.	Testing Completeness Rate								Average duration between EIA positive and WB&CD4 counseling	Range of duration between EIA posive and WB&CD4 counseling	Proportion of treatment (CD4<350)			Proportion of treatment (all)			Proportion of EIA positive that intiated ART ever
	Initial HIV EIA screen positive that are eligible for the study	# subjects with WB results and counselling in 30 days	# subjects with CD4 results and counselling in 30 days	Complete WB&CD4 in 30 days	Complete WB&CD4 with counseling in 60 days	Complete WB&CD4 with counseling in 90 days	Complete WB&CD4 with counseling ever	Proportion(%) WB&CD4 with counseling in 30 days			Initial HIV EIA screen positive	Initiated ART in 90 days	Proportion(%) of CD4<350 that initiated ART within 90 days	Initial HIV EIA screen positive	Initiated ART in 90 days	Proportion(%)	Initial HIV EIA screen positive	Initiated ART ever	Proportion(%) of EIA positive that initiated ART ever
1	44	5	0	0	1	6	6	0	116	49-183	44	2	4.54545	44	2	4.54545	44	3	6.81818
2	29	7	0	0	4	5	5	0	50	34-73	29	1	3.44828	29	1	3.44828	29	2	6.89655
3	40	12	2	2	6	7	7	5	38	25-65	40	1	2.5	40	1	2.5	40	1	2.5
4	33	12	2	2	14	16	16	6.06061	41	20-78	33	9	27.2727	33	9	27.2727	33	10	30.303
5	41	10	4	4	8	10	14	9.7561	69	13-167	41	8	19.5122	41	9	21.9512	41	9	21.9512
6	36	8	4	4	7	8	8	11.1111	33	16-62	36	2	5.55556	36	2	5.55556	36	2	5.55556
7	34	13	4	4	10	14	14	11.7647	59	14-179	34	3	8.82353	34	4	11.7647	34	7	20.5882
8	40	13	5	5	8	10	11	12.5	41	20-105	40	4	10	40	4	10	40	4	10
9	29	7	4	4	7	10	10	13.7931	54	14-208	29	6	20.6897	29	7	24.1379	29	7	24.1379
10	48	38	8	8	21	24	26	16.6667	44	19-111	48	8	16.6667	48	9	18.75	48	11	22.9167
11	43	16	13	13	16	16	16	30.2326	22	11-54	43	5	11.6279	43	7	16.2791	43	8	18.6047
12	47	20	15	15	21	24	24	31.9149	38	0-260	47	6	12.766	47	7	14.8936	47	9	19.1489
13	26	10	10	10	11	11	11	38.4615	19	11-32	26	5	19.2308	26	6	23.0769	26	6	23.0769
14	33	14	13	13	15	17	17	39.3939	29	3-83	33	5	15.1515	33	5	15.1515	33	5	15.1515
15	73	49	32	32	38	41	41	43.8356	28	15-79	73	11	15.0685	73	11	15.0685	73	14	19.1781
16	37	27	18	18	24	24	25	48.6486	28	9-126	37	10	27.027	37	10	27.027	37	11	29.7297
17	51	31	29	27	32	35	36	52.9412	27	6-91	51	19	37.2549	51	21	41.1765	51	25	49.0196
18	15	13	13	13	13	13	13	86.6667	14	1-30	15	10	66.6667	15	10	66.6667	15	10	66.6667
